# Supplementary material for: A one year investigation of the occurrence of illicit drugs in wastewater from Brussels, Belgium
Source: Royal Society of Chemistry journal article supplement (doi:10.1039/c0em00686f), 2011-01-01

## Supporting Information

### **A one year investigation of the occurrence of illicit drugs in wastewater from Brussels, Belgium**

Alexander L. N. van Nuijs<sup>a\*</sup>, Jean-François Mougel<sup>b</sup>, Isabela Tarcomnicu<sup>a</sup>, Lieven Bervoets<sup>c</sup>,  
Ronny Blust<sup>c</sup>, Philippe G. Jorens<sup>d</sup>, Hugo Neels<sup>a,e</sup>, Adrian Covaci<sup>a,c</sup>

a - Toxicological Centre, Department of Pharmaceutical Sciences, University of Antwerp  
(UA), Universiteitsplein 1, 2610 Antwerp, Belgium

b – Aquiris Wastewater Treatment Plant Brussels-North, Vilvoordselaan 450, 1130 Brussels,  
Belgium

c - Laboratory for Ecophysiology, Biochemistry and Toxicology, Department of Biology,  
University of Antwerp (UA), Groenenborgerlaan 171, 2020 Antwerp, Belgium

d - Department of Clinical Pharmacology/Clinical Toxicology, University of Antwerp (UA),  
University Hospital of Antwerp, Universiteitsplein 1, 2610 Antwerp, Belgium

e - Laboratory of Toxicology, ZNA Stuivenberg, Lange Beeldekensstraat 267, 2060, Antwerp,  
Belgium

\* Corresponding author: Alexander L.N. van Nuijs, Toxicological Centre, Department of  
Pharmaceutical Sciences, University of Antwerp, Universiteitsplein 1, 2610 Antwerp,  
Belgium. Tel.: +32-3-265-2743; Fax: +32-3-265-2722; E-mail: [alexander.vannuijs@ua.ac.be](mailto:alexander.vannuijs@ua.ac.be)

## Content

Tables: 4      Figures: 2

## Tables

Table S1. Results of the analyses of the influent wastewater samples collected in March-April 2009. Concentrations are given in ng/L.

Table S2. Results of the analyses of the influent wastewater samples collected in June-July 2009. Concentrations are given in ng/L.

Table S3. Results of the analyses of the influent wastewater samples collected in September-October 2009. Concentrations are given in ng/L.

Table S4. Results of the analyses of the influent wastewater samples collected in December-January 2009-2010. Concentrations are given in ng/L. nd = not determined

## Figures

Figure S1. Diurnal variation (average of one month) in the flow rate of the Brussels-North wastewater treatment plant.

Figure S2. Mean variations between seasons and months in mass loads (in g/day) of illicit drugs and metabolites in influent wastewater from the wastewater treatment plant of Brussels-North. COC: cocaine; BE: benzoylecgonine; EME: ecgonine methyl ester; AMP: amphetamine; MDMA: methylenedioxymethamphetamine; METH: methamphetamine; 6-MAM: 6-monoacetylmorphine; EDDP: ethylidenedimethyldiphenylpyrrolidine; MTD: methadone.

Table S1. Results of the analyses of the influent wastewater samples collected in March-April 2009. Concentrations are given in ng/L.

| Date     | Day       | Flow rate (m <sup>3</sup> /day) | Conc COC | Conc BE | Conc EME | Conc 6-MAM | Conc AMP | Conc MDMA | Conc METH | Conc MTD | Conc EDDP | MTD/EDDP | COC/BE | EME/COC | EME/BE |
|----------|-----------|---------------------------------|----------|---------|----------|------------|----------|-----------|-----------|----------|-----------|----------|--------|---------|--------|
| 2/03/09  | Monday    | 252584                          | 412      | 917     | 182      | 33         | 64       | 13        | 9         | 56       | 124       | 0.45     | 0.45   | 0.44    | 0.20   |
| 3/03/09  | Tuesday   | 243287                          | 340      | 866     | 218      | 26         | 56       | 6         | 3         | 47       | 105       | 0.45     | 0.39   | 0.64    | 0.25   |
| 4/03/09  | Wednesday | 261336                          | 345      | 801     | 179      | 30         | 47       | 4         | 2         | 55       | 120       | 0.46     | 0.43   | 0.52    | 0.22   |
| 5/03/09  | Thursday  | 247583                          | 416      | 898     | 207      | 27         | 57       | 4         | 3         | 58       | 118       | 0.49     | 0.46   | 0.50    | 0.23   |
| 6/03/09  | Friday    | 227271                          | 387      | 965     | 247      | 26         | 63       | 5         | 2         | 65       | 130       | 0.50     | 0.40   | 0.64    | 0.26   |
| 7/03/09  | Saturday  | 235106                          | 498      | 1207    | 311      | 27         | 80       | 75        | 3         | 62       | 131       | 0.47     | 0.41   | 0.62    | 0.26   |
| 8/03/09  | Sunday    | 390619                          | 287      | 627     | 180      | 11         | 85       | 22        | 3         | 41       | 99        | 0.41     | 0.46   | 0.63    | 0.29   |
| 9/03/09  | Monday    | 361553                          | 225      | 506     | 114      | 14         | 50       | 10        | 3         | 39       | 79        | 0.49     | 0.44   | 0.51    | 0.23   |
| 10/03/09 | Tuesday   | 371972                          | 189      | 366     | 87       | 9          | 36       | 4         | 2         | 32       | 59        | 0.54     | 0.52   | 0.46    | 0.24   |
| 11/03/09 | Wednesday | 270537                          | 368      | 702     | 163      | 21         | 56       | 5         | 3         | 45       | 88        | 0.51     | 0.52   | 0.44    | 0.23   |
| 12/03/09 | Thursday  | 272277                          | 318      | 674     | 158      | 17         | 50       | 4         | 2         | 51       | 112       | 0.46     | 0.47   | 0.50    | 0.23   |
| 13/03/09 | Friday    | 260975                          | 352      | 814     | 202      | 20         | 52       | 4         | 2         | 59       | 114       | 0.52     | 0.43   | 0.57    | 0.25   |
| 14/03/09 | Saturday  | 246290                          | 406      | 934     | 258      | 19         | 64       | 9         | 2         | 58       | 119       | 0.49     | 0.43   | 0.64    | 0.28   |
| 15/03/09 | Sunday    | 240321                          | 493      | 1014    | 238      | 24         | 73       | 23        | 3         | 52       | 116       | 0.45     | 0.49   | 0.48    | 0.23   |
| 16/03/09 | Monday    | 248841                          | 359      | 650     | 154      | 13         | 61       | 13        | 3         | 50       | 106       | 0.47     | 0.55   | 0.43    | 0.24   |
| 17/03/09 | Tuesday   | 245472                          | 310      | 635     | 144      | 16         | 52       | 9         | 3         | 56       | 108       | 0.52     | 0.49   | 0.46    | 0.23   |
| 18/03/09 | Wednesday | 243576                          | 371      | 653     | 150      | 29         | 51       | 6         | 2         | 68       | 127       | 0.54     | 0.57   | 0.40    | 0.23   |
| 19/03/09 | Thursday  | 244549                          | 424      | 683     | 177      | 23         | 54       | 4         | 2         | 63       | 117       | 0.54     | 0.62   | 0.42    | 0.26   |
| 20/03/09 | Friday    | 238079                          | 388      | 766     | 184      | 16         | 61       | 5         | 2         | 70       | 128       | 0.55     | 0.51   | 0.47    | 0.24   |
| 21/03/09 | Saturday  | 231617                          | 418      | 834     | 231      | 18         | 59       | 8         | 2         | 56       | 110       | 0.51     | 0.50   | 0.55    | 0.28   |
| 22/03/09 | Sunday    | 231568                          | 362      | 689     | 173      | 15         | 56       | 8         | 2         | 66       | 121       | 0.55     | 0.53   | 0.48    | 0.25   |
| 23/03/09 | Monday    | 275100                          | 199      | 365     | 81       | 12         | 36       | 4         | 3         | 36       | 71        | 0.51     | 0.55   | 0.41    | 0.22   |
| 24/03/09 | Tuesday   | 264678                          | 169      | 357     | 89       | 10         | 39       | 4         | 3         | 38       | 91        | 0.42     | 0.47   | 0.53    | 0.25   |
| 25/03/09 | Wednesday | 289185                          | 129      | 201     | 45       | 8          | 20       | 2         | 2         | 21       | 40        | 0.53     | 0.64   | 0.35    | 0.22   |
| 26/03/09 | Thursday  | 337922                          | 130      | 225     | 54       | 6          | 24       | 2         | 2         | 24       | 48        | 0.50     | 0.58   | 0.42    | 0.24   |
| 27/03/09 | Friday    | 346884                          | 212      | 436     | 102      | 8          | 32       | 2         | 1         | 37       | 76        | 0.49     | 0.49   | 0.48    | 0.23   |
| 28/03/09 | Saturday  | 307919                          | 181      | 389     | 94       | 5          | 31       | 4         | 2         | 24       | 45        | 0.53     | 0.47   | 0.52    | 0.24   |
| 29/03/09 | Sunday    | 299501                          | 311      | 597     | 155      | 13         | 59       | 14        | 6         | 36       | 71        | 0.51     | 0.52   | 0.50    | 0.26   |
| 30/03/09 | Monday    | 275611                          | 297      | 518     | 118      | 19         | 53       | 9         | 3         | 46       | 89        | 0.52     | 0.57   | 0.40    | 0.23   |
| 31/03/09 | Tuesday   | 264083                          | 313      | 512     | 127      | 20         | 49       | 5         | 3         | 50       | 99        | 0.51     | 0.61   | 0.41    | 0.25   |
| 1/04/09  | Wednesday | 262020                          | 348      | 759     | 160      | 17         | 42       | 4         | 1         | 45       | 97        | 0.46     | 0.46   | 0.46    | 0.21   |
| 2/04/09  | Thursday  | 257269                          | 366      | 865     | 173      | 12         | 45       | 4         | 2         | 51       | 105       | 0.49     | 0.42   | 0.47    | 0.20   |
| 3/04/09  | Friday    | 253928                          | 590      | 1399    | 213      | 11         | 51       | 5         | 3         | 54       | 117       | 0.46     | 0.42   | 0.36    | 0.15   |
| 4/04/09  | Saturday  | 240836                          | 483      | 1184    | 268      | 18         | 53       | 9         | 2         | 52       | 108       | 0.48     | 0.41   | 0.55    | 0.23   |
| 5/04/09  | Sunday    | 239800                          | 539      | 1160    | 265      | 28         | 72       | 22        | 2         | 50       | 121       | 0.41     | 0.46   | 0.49    | 0.23   |
| 6/04/09  | Monday    | 249069                          | 375      | 838     | 182      | 20         | 59       | 12        | 1         | 47       | 118       | 0.40     | 0.45   | 0.49    | 0.22   |
| 7/04/09  | Tuesday   | 238559                          | 378      | 783     | 160      | 18         | 49       | 7         | 3         | 54       | 118       | 0.46     | 0.48   | 0.42    | 0.20   |
| 8/04/09  | Wednesday | 257782                          | 358      | 739     | 159      | 16         | 39       | 5         | 2         | 45       | 112       | 0.40     | 0.48   | 0.44    | 0.22   |
| 9/04/09  | Thursday  | 233768                          | 354      | 755     | 143      | 15         | 52       | 6         | 3         | 52       | 115       | 0.45     | 0.47   | 0.40    | 0.19   |
| 10/04/09 | Friday    | 234351                          | 390      | 948     | 175      | 20         | 53       | 5         | 1         | 55       | 119       | 0.46     | 0.41   | 0.45    | 0.18   |

|          |           |        |     |      |     |    |    |     |   |    |     |      |      |      |      |
|----------|-----------|--------|-----|------|-----|----|----|-----|---|----|-----|------|------|------|------|
| 11/04/09 | Saturday  | 222505 | 470 | 1156 | 243 | 30 | 49 | 10  | 2 | 59 | 129 | 0.46 | 0.41 | 0.52 | 0.21 |
| 12/04/09 | Sunday    | 233090 | 465 | 1083 | 259 | 20 | 68 | 14  | 5 | 48 | 115 | 0.42 | 0.43 | 0.56 | 0.24 |
| 13/04/09 | Monday    | 215590 | 440 | 971  | 261 | 20 | 67 | 120 | 4 | 54 | 129 | 0.42 | 0.45 | 0.59 | 0.27 |
| 14/04/09 | Tuesday   | 246320 | 355 | 707  | 143 | 22 | 57 | 23  | 3 | 57 | 131 | 0.44 | 0.50 | 0.40 | 0.20 |
| 15/04/09 | Wednesday | 249362 | 340 | 672  | 134 | 17 | 50 | 6   | 2 | 52 | 122 | 0.43 | 0.51 | 0.39 | 0.20 |
| 16/04/09 | Thursday  | 301398 | 272 | 618  | 120 | 12 | 39 | 4   | 2 | 49 | 103 | 0.48 | 0.44 | 0.44 | 0.19 |
| 17/04/09 | Friday    | 313090 | 198 | 375  | 69  | 2  | 26 | 2   | 1 | 24 | 52  | 0.46 | 0.53 | 0.35 | 0.18 |
| 18/04/09 | Saturday  | 260978 | 392 | 955  | 200 | 22 | 45 | 10  | 3 | 51 | 105 | 0.49 | 0.41 | 0.51 | 0.21 |
| 19/04/09 | Sunday    | 240256 | 427 | 1027 | 229 | 29 | 62 | 30  | 3 | 52 | 109 | 0.48 | 0.42 | 0.54 | 0.22 |
| 20/04/09 | Monday    | 243610 | 348 | 783  | 173 | 22 | 63 | 13  | 4 | 51 | 125 | 0.41 | 0.44 | 0.50 | 0.22 |
| 21/04/09 | Tuesday   | 239423 | 325 | 672  | 141 | 20 | 45 | 6   | 3 | 56 | 120 | 0.47 | 0.48 | 0.43 | 0.21 |
| 22/04/09 | Wednesday | 239749 | 332 | 703  | 140 | 28 | 48 | 4   | 2 | 56 | 128 | 0.44 | 0.47 | 0.42 | 0.20 |
| 23/04/09 | Thursday  | 218745 | 335 | 758  | 164 | 25 | 41 | 3   | 2 | 56 | 128 | 0.44 | 0.44 | 0.49 | 0.22 |
| 24/04/09 | Friday    | 238323 | 362 | 840  | 175 | 20 | 49 | 3   | 3 | 58 | 124 | 0.47 | 0.43 | 0.48 | 0.21 |
| 25/04/09 | Saturday  | 234398 | 418 | 1083 | 246 | 21 | 58 | 9   | 3 | 64 | 142 | 0.45 | 0.39 | 0.59 | 0.23 |
| 26/04/09 | Sunday    | 324751 | 262 | 662  | 146 | 7  | 44 | 26  | 2 | 38 | 102 | 0.37 | 0.40 | 0.56 | 0.22 |
| 27/04/09 | Monday    | 256585 | 245 | 546  | 112 | 14 | 64 | 11  | 4 | 42 | 95  | 0.44 | 0.45 | 0.46 | 0.21 |
| 28/04/09 | Tuesday   | 240092 | 316 | 675  | 145 | 21 | 61 | 7   | 3 | 54 | 122 | 0.44 | 0.47 | 0.46 | 0.21 |
| 29/04/09 | Wednesday | 244262 | 328 | 773  | 166 | 21 | 43 | 4   | 2 | 56 | 132 | 0.42 | 0.42 | 0.51 | 0.21 |
| 30/04/09 | Thursday  | 229898 | 378 | 883  | 161 | 19 | 45 | 4   | 3 | 60 | 136 | 0.44 | 0.43 | 0.43 | 0.18 |

Table S2. Results of the analyses of the influent wastewater samples collected in June-July 2009. Concentrations are given in ng/L.

| Date     | Day       | Flow rate (m <sup>3</sup> /day) | Conc COC | Conc BE | Conc EME | Conc 6-MAM | Conc AMP | Conc MDMA | Conc METH | Conc MTD | Conc EDDP | MTD/EDDP | COC/BE | EME/COC | EME/BE |
|----------|-----------|---------------------------------|----------|---------|----------|------------|----------|-----------|-----------|----------|-----------|----------|--------|---------|--------|
| 1/06/09  | Monday    | 221875                          | 399      | 732     | 176      | 24         | 64       | 70        | 9         | 81       | 121       | 0.67     | 0.55   | 0.44    | 0.24   |
| 2/06/09  | Tuesday   | 224471                          | 340      | 605     | 145      | 20         | 56       | 13        | 6         | 66       | 117       | 0.56     | 0.56   | 0.43    | 0.24   |
| 3/06/09  | Wednesday | 223602                          | 323      | 667     | 151      | 26         | 48       | 5         | 4         | 61       | 119       | 0.51     | 0.48   | 0.47    | 0.23   |
| 4/06/09  | Thursday  | 223879                          | 361      | 753     | 197      | 3          | 44       | 4         | 3         | 83       | 110       | 0.75     | 0.48   | 0.55    | 0.26   |
| 5/06/09  | Friday    | 221444                          | 328      | 734     | 176      | 16         | 51       | 4         | 3         | 91       | 121       | 0.75     | 0.45   | 0.54    | 0.24   |
| 6/06/09  | Saturday  | 217778                          | 491      | 939     | 270      | 24         | 57       | 8         | 4         | 71       | 126       | 0.56     | 0.52   | 0.55    | 0.29   |
| 7/06/09  | Sunday    | 233650                          | 415      | 853     | 240      | 26         | 62       | 10        | 6         | 76       | 121       | 0.63     | 0.49   | 0.58    | 0.28   |
| 8/06/09  | Monday    | 241530                          | 335      | 662     | 158      | 27         | 86       | 6         | 4         | 76       | 114       | 0.67     | 0.51   | 0.47    | 0.24   |
| 9/06/09  | Tuesday   | 334210                          | 176      | 338     | 79       | 6          | 32       | 2         | 3         | 32       | 70        | 0.46     | 0.52   | 0.45    | 0.23   |
| 10/06/09 | Wednesday | 376457                          | 134      | 249     | 58       | 4          | 15       | 2         | 3         | 23       | 41        | 0.56     | 0.54   | 0.43    | 0.23   |
| 11/06/09 | Thursday  | 292566                          | 169      | 323     | 80       | 8          | 29       | 1         | 3         | 30       | 47        | 0.64     | 0.52   | 0.47    | 0.25   |
| 12/06/09 | Friday    | 247759                          | 371      | 716     | 200      | 18         | 60       | 3         | 2         | 64       | 99        | 0.65     | 0.52   | 0.54    | 0.28   |
| 13/06/09 | Saturday  | 231594                          | 444      | 927     | 251      | 25         | 75       | 6         | 4         | 75       | 112       | 0.67     | 0.48   | 0.57    | 0.27   |
| 14/06/09 | Sunday    | 269251                          | 412      | 619     | 142      | 10         | 61       | 8         | 3         | 46       | 70        | 0.66     | 0.67   | 0.34    | 0.23   |
| 15/06/09 | Monday    | 276484                          | 292      | 501     | 121      | 15         | 59       | 5         | 4         | 65       | 112       | 0.58     | 0.58   | 0.41    | 0.24   |
| 16/06/09 | Tuesday   | 236851                          | 360      | 565     | 124      | 22         | 71       | 3         | 4         | 66       | 116       | 0.57     | 0.64   | 0.34    | 0.22   |
| 17/06/09 | Wednesday | 229732                          | 374      | 595     | 172      | 26         | 73       | 3         | 4         | 65       | 125       | 0.52     | 0.63   | 0.46    | 0.29   |
| 18/06/09 | Thursday  | 226308                          | 344      | 681     | 193      | 22         | 97       | 2         | 3         | 66       | 129       | 0.51     | 0.51   | 0.56    | 0.28   |
| 19/06/09 | Friday    | 222997                          | 376      | 716     | 187      | 8          | 72       | 7         | 3         | 79       | 149       | 0.53     | 0.53   | 0.50    | 0.26   |
| 20/06/09 | Saturday  | 237557                          | 397      | 853     | 265      | 15         | 87       | 30        | 4         | 88       | 128       | 0.69     | 0.47   | 0.67    | 0.31   |
| 21/06/09 | Sunday    | 273117                          | 311      | 521     | 147      | 12         | 55       | 13        | 4         | 44       | 82        | 0.54     | 0.60   | 0.47    | 0.28   |
| 22/06/09 | Monday    | 241453                          | 327      | 574     | 144      | 20         | 75       | 7         | 4         | 66       | 109       | 0.61     | 0.57   | 0.44    | 0.25   |
| 23/06/09 | Tuesday   | 220657                          | 307      | 579     | 149      | 13         | 57       | 5         | 3         | 64       | 124       | 0.52     | 0.53   | 0.49    | 0.26   |
| 24/06/09 | Wednesday | 225269                          | 365      | 572     | 174      | 14         | 60       | 3         | 4         | 67       | 123       | 0.54     | 0.64   | 0.48    | 0.30   |
| 25/06/09 | Thursday  | 229475                          | 332      | 591     | 169      | 12         | 64       | 4         | 3         | 66       | 126       | 0.52     | 0.56   | 0.51    | 0.29   |
| 26/06/09 | Friday    | 222979                          | 393      | 665     | 177      | 10         | 61       | 3         | 3         | 68       | 137       | 0.50     | 0.59   | 0.45    | 0.27   |
| 27/06/09 | Saturday  | 229775                          | 450      | 819     | 233      | 11         | 71       | 11        | 4         | 70       | 135       | 0.52     | 0.55   | 0.52    | 0.28   |
| 28/06/09 | Sunday    | 214324                          | 447      | 864     | 248      | 15         | 97       | 11        | 4         | 92       | 158       | 0.58     | 0.52   | 0.55    | 0.29   |
| 29/06/09 | Monday    | 220864                          | 360      | 677     | 196      | 17         | 82       | 9         | 3         | 87       | 147       | 0.59     | 0.53   | 0.54    | 0.29   |
| 30/06/09 | Tuesday   | 209769                          | 308      | 633     | 171      | 14         | 75       | 5         | 3         | 105      | 137       | 0.77     | 0.49   | 0.56    | 0.27   |
| 1/07/09  | Wednesday | 220805                          | 335      | 624     | 154      | 11         | 66       | 4         | 3         | 83       | 120       | 0.69     | 0.54   | 0.46    | 0.25   |
| 2/07/09  | Thursday  | 226417                          | 347      | 664     | 157      | 12         | 67       | 3         | 3         | 79       | 124       | 0.64     | 0.52   | 0.45    | 0.24   |
| 3/07/09  | Friday    | 209718                          | 343      | 771     | 187      | 11         | 70       | 2         | 3         | 76       | 123       | 0.62     | 0.44   | 0.55    | 0.24   |
| 4/07/09  | Saturday  | 200403                          | 546      | 967     | 263      | 13         | 82       | 4         | 5         | 79       | 132       | 0.60     | 0.56   | 0.48    | 0.27   |
| 5/07/09  | Sunday    | 217672                          | 386      | 793     | 211      | 7          | 87       | 7         | 4         | 63       | 132       | 0.48     | 0.49   | 0.55    | 0.27   |
| 6/07/09  | Monday    | 288051                          | 236      | 462     | 110      | 8          | 51       | 5         | 3         | 56       | 114       | 0.49     | 0.51   | 0.47    | 0.24   |
| 7/07/09  | Tuesday   | 289766                          | 164      | 321     | 83       | 7          | 42       | 2         | 4         | 43       | 102       | 0.42     | 0.51   | 0.51    | 0.26   |
| 8/07/09  | Wednesday | 293176                          | 180      | 383     | 91       | 4          | 46       | 1         | 4         | 37       | 76        | 0.49     | 0.47   | 0.51    | 0.24   |
| 9/07/09  | Thursday  | 291191                          | 157      | 352     | 79       | 3          | 43       | 1         | 3         | 35       | 58        | 0.60     | 0.45   | 0.50    | 0.22   |
| 10/07/09 | Friday    | 206360                          | 279      | 692     | 167      | 13         | 69       | 3         | 3         | 72       | 101       | 0.71     | 0.40   | 0.60    | 0.24   |
| 11/07/09 | Saturday  | 305252                          | 290      | 644     | 162      | 6          | 80       | 2         | 4         | 45       | 88        | 0.51     | 0.45   | 0.56    | 0.25   |
| 12/07/09 | Sunday    | 220714                          | 291      | 622     | 166      | 6          | 119      | 11        | 4         | 42       | 86        | 0.49     | 0.47   | 0.57    | 0.27   |

|          |           |        |     |     |     |    |    |    |   |    |     |      |      |      |      |
|----------|-----------|--------|-----|-----|-----|----|----|----|---|----|-----|------|------|------|------|
| 13/07/09 | Monday    | 201526 | 272 | 591 | 149 | 8  | 91 | 6  | 3 | 70 | 109 | 0.64 | 0.46 | 0.55 | 0.25 |
| 14/07/09 | Tuesday   | 210285 | 267 | 550 | 143 | 10 | 75 | 2  | 3 | 78 | 118 | 0.66 | 0.49 | 0.54 | 0.26 |
| 15/07/09 | Wednesday | 200369 | 271 | 577 | 137 | 11 | 69 | 1  | 3 | 85 | 121 | 0.70 | 0.47 | 0.51 | 0.24 |
| 16/07/09 | Thursday  | 202397 | 275 | 599 | 145 | 15 | 78 | 3  | 3 | 98 | 128 | 0.77 | 0.46 | 0.53 | 0.24 |
| 17/07/09 | Friday    | 263564 | 220 | 483 | 112 | 5  | 64 | 6  | 3 | 63 | 127 | 0.50 | 0.46 | 0.51 | 0.23 |
| 18/07/09 | Saturday  | 245124 | 204 | 547 | 127 | 5  | 62 | 24 | 3 | 50 | 87  | 0.57 | 0.37 | 0.62 | 0.23 |
| 19/07/09 | Sunday    | 320316 | 173 | 417 | 93  | 2  | 47 | 7  | 2 | 32 | 68  | 0.47 | 0.41 | 0.54 | 0.22 |
| 20/07/09 | Monday    | 201139 | 242 | 548 | 129 | 7  | 75 | 9  | 3 | 65 | 105 | 0.62 | 0.44 | 0.53 | 0.24 |
| 21/07/09 | Tuesday   | 202004 | 293 | 567 | 139 | 11 | 81 | 8  | 4 | 60 | 123 | 0.49 | 0.52 | 0.47 | 0.25 |
| 22/07/09 | Wednesday | 294091 | 155 | 302 | 78  | 5  | 62 | 3  | 3 | 41 | 103 | 0.40 | 0.51 | 0.50 | 0.26 |
| 23/07/09 | Thursday  | 336772 | 133 | 249 | 58  | 3  | 51 | 1  | 3 | 28 | 63  | 0.44 | 0.53 | 0.44 | 0.23 |
| 24/07/09 | Friday    | 264779 | 154 | 353 | 79  | 5  | 49 | 3  | 2 | 44 | 77  | 0.57 | 0.44 | 0.51 | 0.22 |
| 25/07/09 | Saturday  | 188914 | 289 | 722 | 178 | 11 | 82 | 4  | 3 | 72 | 124 | 0.58 | 0.40 | 0.62 | 0.25 |
| 26/07/09 | Sunday    | 178946 | 297 | 734 | 179 | 9  | 75 | 8  | 3 | 72 | 128 | 0.56 | 0.40 | 0.60 | 0.24 |
| 27/07/09 | Monday    | 205061 | 225 | 471 | 112 | 9  | 76 | 5  | 3 | 68 | 137 | 0.50 | 0.48 | 0.50 | 0.24 |
| 28/07/09 | Tuesday   | 193083 | 233 | 479 | 108 | 9  | 81 | 3  | 3 | 78 | 139 | 0.56 | 0.49 | 0.46 | 0.23 |
| 29/07/09 | Wednesday | 272070 | 187 | 383 | 91  | 8  | 47 | 2  | 2 | 56 | 132 | 0.42 | 0.49 | 0.49 | 0.24 |
| 30/07/09 | Thursday  | 192680 | 244 | 529 | 139 | 9  | 76 | 1  | 5 | 67 | 114 | 0.59 | 0.46 | 0.57 | 0.26 |
| 31/07/09 | Friday    | 192596 | 275 | 607 | 139 | 7  | 73 | 1  | 3 | 76 | 151 | 0.50 | 0.45 | 0.51 | 0.23 |

Table S3. Results of the analyses of the influent wastewater samples collected in September-October 2009. Concentrations are given in ng/L.

| Date       | Day       | Flow rate (m <sup>3</sup> /day) | Conc COC | Conc BE | Conc EME | Conc 6-MAM | Conc AMP | Conc MDMA | Conc METH | Conc MTD | Conc EDDP | MTD/EDDP | COC/BE | COC/EME | EME/BE |
|------------|-----------|---------------------------------|----------|---------|----------|------------|----------|-----------|-----------|----------|-----------|----------|--------|---------|--------|
| 1/09/2009  | Tuesday   | 283972                          | 187      | 419     | 98       | 6          | 51       | 3         | 2         | 50       | 120       | 0.42     | 0.45   | 0.52    | 0.23   |
| 2/09/2009  | Wednesday | 340504                          | 160      | 428     | 88       | 8          | 39       | 2         | 2         | 40       | 100       | 0.40     | 0.37   | 0.55    | 0.21   |
| 3/09/2009  | Thursday  | 288530                          | 144      | 405     | 77       | 7          | 33       | 3         | 2         | 31       | 76        | 0.41     | 0.36   | 0.53    | 0.19   |
| 4/09/2009  | Friday    | 283028                          | 196      | 561     | 107      | 9          | 51       | 2         | 2         | 44       | 96        | 0.46     | 0.35   | 0.55    | 0.19   |
| 5/09/2009  | Saturday  | 206324                          | 318      | 933     | 213      | 5          | 64       | 3         | 3         | 51       | 123       | 0.41     | 0.34   | 0.67    | 0.23   |
| 6/09/2009  | Sunday    | 205384                          | 388      | 945     | 217      | 6          | 79       | 8         | 3         | 58       | 132       | 0.44     | 0.41   | 0.56    | 0.23   |
| 7/09/2009  | Monday    | 214568                          | 307      | 711     | 144      | 7          | 67       | 5         | 2         | 60       | 135       | 0.44     | 0.43   | 0.47    | 0.20   |
| 8/09/2009  | Tuesday   | 213296                          | 276      | 677     | 139      | 8          | 67       | 3         | 4         | 60       | 135       | 0.44     | 0.41   | 0.50    | 0.21   |
| 9/09/2009  | Wednesday | 213545                          | 270      | 681     | 135      | 9          | 57       | 2         | 3         | 55       | 135       | 0.41     | 0.40   | 0.50    | 0.20   |
| 10/09/2009 | Thursday  | 209254                          | 310      | 682     | 146      | 8          | 53       | 2         | 3         | 57       | 140       | 0.41     | 0.45   | 0.47    | 0.21   |
| 11/09/2009 | Friday    | 210980                          | 387      | 709     | 142      | 10         | 60       | 2         | 7         | 55       | 137       | 0.40     | 0.55   | 0.37    | 0.20   |
| 12/09/2009 | Saturday  | 202220                          | 408      | 855     | 194      | 8          | 65       | 29        | 4         | 56       | 138       | 0.41     | 0.48   | 0.48    | 0.23   |
| 13/09/2009 | Sunday    | 205993                          | 402      | 836     | 187      | 8          | 73       | 14        | 3         | 54       | 136       | 0.40     | 0.48   | 0.47    | 0.22   |
| 14/09/2009 | Monday    | 332173                          | 200      | 394     | 90       | 7          | 39       | 6         | 3         | 36       | 105       | 0.34     | 0.51   | 0.45    | 0.23   |
| 15/09/2009 | Tuesday   | 223661                          | 272      | 485     | 111      | 12         | 45       | 4         | 3         | 52       | 104       | 0.50     | 0.56   | 0.41    | 0.23   |
| 16/09/2009 | Wednesday | 220736                          | 311      | 583     | 128      | 10         | 54       | 3         | 3         | 55       | 126       | 0.44     | 0.53   | 0.41    | 0.22   |
| 17/09/2009 | Thursday  | 222023                          | 330      | 612     | 140      | 13         | 84       | 3         | 4         | 59       | 139       | 0.42     | 0.54   | 0.42    | 0.23   |
| 18/09/2009 | Friday    | 219684                          | 374      | 709     | 140      | 10         | 59       | 3         | 3         | 64       | 139       | 0.46     | 0.53   | 0.37    | 0.20   |
| 19/09/2009 | Saturday  | 215085                          | 467      | 920     | 195      | 13         | 79       | 45        | 5         | 60       | 143       | 0.42     | 0.51   | 0.42    | 0.21   |
| 20/09/2009 | Sunday    | 211824                          | 422      | 883     | 203      | 13         | 89       | 17        | 5         | 51       | 143       | 0.36     | 0.48   | 0.48    | 0.23   |
| 21/09/2009 | Monday    | 216033                          | 337      | 675     | 135      | 13         | 80       | 9         | 4         | 53       | 140       | 0.38     | 0.50   | 0.40    | 0.20   |
| 22/09/2009 | Tuesday   | 211135                          | 392      | 621     | 117      | 12         | 65       | 5         | 3         | 53       | 138       | 0.38     | 0.63   | 0.30    | 0.19   |
| 23/09/2009 | Wednesday | 215163                          | 353      | 616     | 144      | 13         | 51       | 3         | 3         | 51       | 139       | 0.37     | 0.57   | 0.41    | 0.23   |
| 24/09/2009 | Thursday  | 228664                          | 319      | 588     | 137      | 11         | 52       | 3         | 3         | 48       | 131       | 0.37     | 0.54   | 0.43    | 0.23   |
| 25/09/2009 | Friday    | 211081                          | 367      | 693     | 145      | 12         | 58       | 3         | 3         | 54       | 127       | 0.43     | 0.53   | 0.40    | 0.21   |
| 26/09/2009 | Saturday  | 203323                          | 482      | 941     | 210      | 14         | 68       | 6         | 3         | 58       | 146       | 0.40     | 0.51   | 0.44    | 0.22   |
| 27/09/2009 | Sunday    | 206114                          | 444      | 912     | 209      | 12         | 86       | 21        | 4         | 52       | 151       | 0.34     | 0.49   | 0.47    | 0.23   |
| 28/09/2009 | Monday    | 216953                          | 329      | 659     | 144      | 14         | 71       | 10        | 4         | 52       | 144       | 0.36     | 0.50   | 0.44    | 0.22   |
| 29/09/2009 | Tuesday   | 213628                          | 372      | 657     | 134      | 13         | 62       | 4         | 3         | 50       | 137       | 0.36     | 0.57   | 0.36    | 0.20   |
| 30/09/2009 | Wednesday | 213001                          | 228      | 607     | 171      | 3          | 15       | 2         | 2         | 53       | 134       | 0.40     | 0.38   | 0.75    | 0.28   |
| 1/10/2009  | Thursday  | 211228                          | 299      | 631     | 87       | 19         | 46       | 5         | 3         | 63       | 130       | 0.48     | 0.47   | 0.29    | 0.14   |
| 2/10/2009  | Friday    | 205325                          | 278      | 683     | 86       | 15         | 47       | 4         | 3         | 67       | 132       | 0.51     | 0.41   | 0.31    | 0.13   |
| 3/10/2009  | Saturday  | 225275                          | 309      | 838     | 107      | 13         | 52       | 7         | 3         | 65       | 140       | 0.46     | 0.37   | 0.35    | 0.13   |
| 4/10/2009  | Sunday    | 211264                          | 461      | 900     | 132      | 20         | 76       | 19        | 3         | 66       | 125       | 0.53     | 0.51   | 0.29    | 0.15   |
| 5/10/2009  | Monday    | 406713                          | 137      | 316     | 47       | 7          | 31       | 6         | 2         | 36       | 76        | 0.47     | 0.43   | 0.34    | 0.15   |
| 6/10/2009  | Tuesday   | 372714                          | 119      | 250     | 41       | 4          | 27       | 3         | 2         | 31       | 68        | 0.46     | 0.48   | 0.34    | 0.16   |
| 7/10/2009  | Wednesday | 495855                          | 60       | 170     | 27       | 3          | 12       | 2         | 2         | 14       | 27        | 0.52     | 0.35   | 0.45    | 0.16   |
| 8/10/2009  | Thursday  | 324445                          | 120      | 316     | 48       | 6          | 21       | 2         | 2         | 30       | 61        | 0.49     | 0.38   | 0.40    | 0.15   |
| 9/10/2009  | Friday    | 378825                          | 127      | 341     | 51       | 4          | 30       | 6         | 2         | 31       | 55        | 0.56     | 0.37   | 0.40    | 0.15   |
| 10/10/2009 | Saturday  | 332262                          | 166      | 436     | 77       | 2          | 34       | 5         | 2         | 31       | 57        | 0.54     | 0.38   | 0.46    | 0.18   |
| 11/10/2009 | Sunday    | 258242                          | 280      | 705     | 131      | 15         | 52       | 11        | 4         | 52       | 96        | 0.54     | 0.40   | 0.47    | 0.19   |
| 12/10/2009 | Monday    | 232342                          | 210      | 524     | 85       | 8          | 57       | 8         | 3         | 58       | 96        | 0.60     | 0.40   | 0.40    | 0.16   |

|            |           |        |     |     |     |    |    |    |   |    |     |      |      |      |      |
|------------|-----------|--------|-----|-----|-----|----|----|----|---|----|-----|------|------|------|------|
| 13/10/2009 | Tuesday   | 225862 | 224 | 525 | 83  | 9  | 54 | 6  | 4 | 63 | 92  | 0.68 | 0.43 | 0.37 | 0.16 |
| 14/10/2009 | Wednesday | 224233 | 206 | 504 | 101 | 16 | 46 | 4  | 3 | 60 | 96  | 0.63 | 0.41 | 0.49 | 0.20 |
| 15/10/2009 | Thursday  | 220250 | 219 | 514 | 102 | 11 | 42 | 5  | 3 | 59 | 98  | 0.60 | 0.43 | 0.47 | 0.20 |
| 16/10/2009 | Friday    | 253295 | 208 | 522 | 90  | 8  | 52 | 4  | 3 | 59 | 104 | 0.57 | 0.40 | 0.43 | 0.17 |
| 17/10/2009 | Saturday  | 225506 | 314 | 748 | 152 | 11 | 66 | 13 | 3 | 55 | 98  | 0.56 | 0.42 | 0.48 | 0.20 |
| 18/10/2009 | Sunday    | 212618 | 316 | 737 | 158 | 15 | 78 | 18 | 4 | 54 | 105 | 0.51 | 0.43 | 0.50 | 0.21 |
| 19/10/2009 | Monday    | 226636 | 212 | 537 | 111 | 16 | 63 | 10 | 3 | 63 | 108 | 0.58 | 0.39 | 0.52 | 0.21 |
| 20/10/2009 | Tuesday   | 225046 | 221 | 478 | 108 | 11 | 50 | 5  | 2 | 65 | 109 | 0.60 | 0.46 | 0.49 | 0.23 |
| 21/10/2009 | Wednesday | 247988 | 213 | 489 | 115 | 9  | 54 | 3  | 2 | 55 | 115 | 0.48 | 0.44 | 0.54 | 0.24 |
| 22/10/2009 | Thursday  | 228579 | 233 | 539 | 128 | 12 | 51 | 4  | 2 | 50 | 103 | 0.49 | 0.43 | 0.55 | 0.24 |
| 23/10/2009 | Friday    | 221572 | 251 | 634 | 141 | 9  | 59 | 11 | 2 | 56 | 112 | 0.50 | 0.40 | 0.56 | 0.22 |
| 24/10/2009 | Saturday  | 260261 | 314 | 751 | 210 | 10 | 85 | 78 | 4 | 51 | 119 | 0.43 | 0.42 | 0.67 | 0.28 |
| 25/10/2009 | Sunday    | 224119 | 326 | 765 | 186 | 14 | 86 | 65 | 5 | 49 | 121 | 0.40 | 0.43 | 0.57 | 0.24 |
| 26/10/2009 | Monday    | 217753 | 251 | 590 | 132 | 13 | 80 | 75 | 3 | 56 | 120 | 0.47 | 0.43 | 0.53 | 0.22 |
| 27/10/2009 | Tuesday   | 215395 | 230 | 527 | 120 | 14 | 62 | 15 | 3 | 55 | 125 | 0.44 | 0.44 | 0.52 | 0.23 |
| 28/10/2009 | Wednesday | 216495 | 257 | 541 | 133 | 14 | 56 | 7  | 2 | 57 | 120 | 0.48 | 0.48 | 0.52 | 0.25 |
| 29/10/2009 | Thursday  | 214070 | 256 | 584 | 145 | 13 | 59 | 4  | 2 | 55 | 123 | 0.45 | 0.44 | 0.57 | 0.25 |
| 30/10/2009 | Friday    | 205604 | 305 | 722 | 179 | 14 | 70 | 7  | 3 | 64 | 128 | 0.50 | 0.42 | 0.59 | 0.25 |
| 31/10/2009 | Saturday  | 198123 | 381 | 999 | 235 | 16 | 69 | 11 | 3 | 60 | 121 | 0.50 | 0.38 | 0.62 | 0.24 |
| 1/11/2009  | Sunday    | 357961 | 285 | 451 | 116 | 5  | 37 | 10 | 2 | 31 | 71  | 0.44 | 0.63 | 0.41 | 0.26 |



Table S4. Results of the analyses of the influent wastewater samples collected in December-January 2009-2010. nd = not determined.

Concentrations are given in ng/L.

| Date       | Day       | Flow rate (m <sup>3</sup> /day) | Conc COC | Conc BE | Conc EME | Conc 6-MAM | Conc AMP | Conc MDMA | Conc METH | Conc MTD | Conc EDDP | MTD/EDDP | COC/BE | COC/EME | EME/BE |
|------------|-----------|---------------------------------|----------|---------|----------|------------|----------|-----------|-----------|----------|-----------|----------|--------|---------|--------|
| 1/12/2009  | Tuesday   | 139397                          | 241      | 439     | 171      | 6          | 63       | 2         | 2         | 38       | 95        | 0.40     | 0.55   | 0.71    | 0.23   |
| 2/12/2009  | Wednesday | 168080                          | 203      | 457     | 183      | 4          | 45       | 1         | 2         | 34       | 83        | 0.41     | 0.44   | 0.90    | 0.20   |
| 3/12/2009  | Thursday  | 183354                          | 155      | 288     | 93       | 4          | 34       | 1         | 2         | 23       | 56        | 0.41     | 0.54   | 0.60    | 0.22   |
| 4/12/2009  | Friday    | 168302                          | 1603     | 519     | 154      | 5          | 34       | 1         | 1         | 26       | 57        | 0.46     | 3.09   | 0.10    | 0.20   |
| 5/12/2009  | Saturday  | 172999                          | 169      | 354     | 110      | 2          | 34       | 3         | 1         | 23       | 44        | 0.52     | 0.48   | 0.65    | 0.31   |
| 6/12/2009  | Sunday    | 162027                          | 225      | 504     | 158      | 5          | 51       | 6         | 2         | 28       | 60        | 0.47     | 0.45   | 0.70    | 0.31   |
| 7/12/2009  | Monday    | 174263                          | 153      | 268     | 110      | 4          | 48       | 3         | 2         | 24       | 66        | 0.36     | 0.57   | 0.72    | 0.21   |
| 8/12/2009  | Tuesday   | 111354                          | 214      | 492     | 138      | 6          | 63       | 2         | 2         | 40       | 82        | 0.49     | 0.43   | 0.64    | 0.28   |
| 9/12/2009  | Wednesday | nd                              | nd       | nd      | nd       | nd         | nd       | nd        | nd        | nd       | nd        | nd       | nd     | nd      | nd     |
| 10/12/2009 | Thursday  | nd                              | nd       | nd      | nd       | nd         | nd       | nd        | nd        | nd       | nd        | nd       | nd     | nd      | nd     |
| 11/12/2009 | Friday    | nd                              | nd       | nd      | nd       | nd         | nd       | nd        | nd        | nd       | nd        | nd       | nd     | nd      | nd     |
| 12/12/2009 | Saturday  | nd                              | nd       | nd      | nd       | nd         | nd       | nd        | nd        | nd       | nd        | nd       | nd     | nd      | nd     |
| 13/12/2009 | Sunday    | nd                              | nd       | nd      | nd       | nd         | nd       | nd        | nd        | nd       | nd        | nd       | nd     | nd      | nd     |
| 14/12/2009 | Monday    | nd                              | nd       | nd      | nd       | nd         | nd       | nd        | nd        | nd       | nd        | nd       | nd     | nd      | nd     |
| 15/12/2009 | Tuesday   | nd                              | nd       | nd      | nd       | nd         | nd       | nd        | nd        | nd       | nd        | nd       | nd     | nd      | nd     |
| 16/12/2009 | Wednesday | nd                              | nd       | nd      | nd       | nd         | nd       | nd        | nd        | nd       | nd        | nd       | nd     | nd      | nd     |
| 17/12/2009 | Thursday  | 27188                           | 261      | 421     | 97       | 4          | 51       | 2         | 2         | 25       | 47        | 0.53     | 0.62   | 0.37    | 0.23   |
| 18/12/2009 | Friday    | 47814                           | 142      | 267     | 70       | 4          | 35       | 3         | 3         | 28       | 58        | 0.48     | 0.53   | 0.49    | 0.26   |
| 19/12/2009 | Saturday  | 120017                          | 339      | 694     | 199      | 8          | 60       | 6         | 3         | 47       | 121       | 0.39     | 0.49   | 0.59    | 0.29   |
| 20/12/2009 | Sunday    | 225117                          | 481      | 912     | 277      | 14         | 93       | 41        | 5         | 60       | 141       | 0.43     | 0.53   | 0.58    | 0.30   |
| 21/12/2009 | Monday    | 307673                          | 517      | 723     | 165      | 11         | 65       | 9         | 2         | 58       | 120       | 0.48     | 0.72   | 0.32    | 0.23   |
| 22/12/2009 | Tuesday   | 447671                          | 215      | 304     | 103      | 8          | 37       | 4         | 3         | 28       | 70        | 0.40     | 0.71   | 0.48    | 0.34   |
| 23/12/2009 | Wednesday | 267787                          | 472      | 644     | 151      | 8          | 50       | 4         | 5         | 44       | 94        | 0.47     | 0.73   | 0.32    | 0.23   |
| 24/12/2009 | Thursday  | 453210                          | 190      | 384     | 99       | 4          | 46       | 2         | 1         | 29       | 72        | 0.40     | 0.49   | 0.52    | 0.26   |
| 25/12/2009 | Friday    | 424763                          | 249      | 433     | 116      | 2          | 35       | 3         | 1         | 22       | 48        | 0.46     | 0.58   | 0.47    | 0.27   |
| 26/12/2009 | Saturday  | 250868                          | 578      | 964     | 198      | 3          | 69       | 8         | 4         | 45       | 102       | 0.44     | 0.60   | 0.34    | 0.21   |
| 27/12/2009 | Sunday    | 265181                          | 417      | 694     | 185      | 8          | 75       | 13        | 4         | 42       | 104       | 0.40     | 0.60   | 0.44    | 0.27   |
| 28/12/2009 | Monday    | 235825                          | 394      | 680     | 164      | 12         | 80       | 12        | 4         | 52       | 121       | 0.43     | 0.58   | 0.42    | 0.24   |
| 29/12/2009 | Tuesday   | 429748                          | 106      | 239     | 58       | 6          | 27       | 3         | 2         | 21       | 48        | 0.44     | 0.44   | 0.55    | 0.24   |
| 30/12/2009 | Wednesday | 433619                          | 192      | 356     | 90       | 5          | 35       | 3         | 2         | 28       | 57        | 0.49     | 0.54   | 0.47    | 0.25   |
| 31/12/2009 | Thursday  | 261615                          | 784      | 891     | 205      | 9          | 60       | 9         | 4         | 55       | 91        | 0.60     | 0.88   | 0.26    | 0.23   |
| 1/01/2010  | Friday    | 225398                          | 742      | 1841    | 524      | 12         | 121      | 95        | 6         | 67       | 113       | 0.59     | 0.40   | 0.71    | 0.28   |
| 2/01/2010  | Saturday  | 228226                          | 948      | 1115    | 262      | 16         | 82       | 197       | 10        | 63       | 115       | 0.55     | 0.85   | 0.28    | 0.23   |
| 3/01/2010  | Sunday    | 249712                          | 388      | 786     | 232      | 19         | 83       | 43        | 5         | 55       | 111       | 0.50     | 0.49   | 0.60    | 0.30   |
| 4/01/2010  | Monday    | 238157                          | 409      | 597     | 160      | 12         | 79       | 22        | 5         | 53       | 115       | 0.46     | 0.69   | 0.39    | 0.27   |
| 5/01/2010  | Tuesday   | 236522                          | 378      | 593     | 162      | 14         | 65       | 9         | 5         | 60       | 133       | 0.45     | 0.64   | 0.43    | 0.27   |
| 6/01/2010  | Wednesday | 233798                          | 442      | 629     | 164      | 15         | 69       | 5         | 4         | 62       | 124       | 0.50     | 0.70   | 0.37    | 0.26   |
| 7/01/2010  | Thursday  | 231873                          | 385      | 667     | 178      | 26         | 67       | 5         | 4         | 69       | 133       | 0.52     | 0.58   | 0.46    | 0.27   |
| 8/01/2010  | Friday    | 231640                          | 351      | 794     | 200      | 9          | 65       | 5         | 3         | 75       | 124       | 0.60     | 0.44   | 0.57    | 0.25   |
| 9/01/2010  | Saturday  | 234082                          | 450      | 941     | 230      | 18         | 53       | 8         | 3         | 73       | 128       | 0.57     | 0.48   | 0.51    | 0.24   |

|            |           |        |     |     |     |    |    |    |   |    |     |      |      |      |      |
|------------|-----------|--------|-----|-----|-----|----|----|----|---|----|-----|------|------|------|------|
| 10/01/2010 | Sunday    | 233911 | 529 | 894 | 208 | 18 | 99 | 13 | 4 | 66 | 137 | 0.48 | 0.59 | 0.39 | 0.23 |
| 11/01/2010 | Monday    | 241668 | 614 | 595 | 145 | 18 | 76 | 8  | 4 | 67 | 131 | 0.51 | 1.03 | 0.24 | 0.24 |
| 12/01/2010 | Tuesday   | 242511 | 347 | 570 | 143 | 14 | 66 | 4  | 4 | 62 | 130 | 0.48 | 0.61 | 0.41 | 0.25 |
| 13/01/2010 | Wednesday | 297270 | 280 | 543 | 177 | 15 | 55 | 3  | 3 | 60 | 113 | 0.53 | 0.52 | 0.63 | 0.33 |
| 14/01/2010 | Thursday  | 301278 | 272 | 468 | 120 | 10 | 54 | 2  | 3 | 46 | 102 | 0.45 | 0.58 | 0.44 | 0.26 |
| 15/01/2010 | Friday    | 245434 | 334 | 676 | 159 | 12 | 67 | 5  | 2 | 72 | 125 | 0.58 | 0.49 | 0.48 | 0.24 |
| 16/01/2010 | Saturday  | 301845 | 374 | 793 | 201 | 10 | 76 | 12 | 2 | 65 | 120 | 0.54 | 0.47 | 0.54 | 0.25 |
| 17/01/2010 | Sunday    | 307047 | 305 | 527 | 124 | 8  | 52 | 8  | 3 | 34 | 77  | 0.44 | 0.58 | 0.41 | 0.24 |
| 18/01/2010 | Monday    | 253449 | 359 | 578 | 130 | 13 | 72 | 8  | 4 | 53 | 111 | 0.48 | 0.62 | 0.36 | 0.22 |
| 19/01/2010 | Tuesday   | 275184 | 321 | 514 | 124 | 11 | 58 | 4  | 4 | 53 | 112 | 0.47 | 0.62 | 0.39 | 0.24 |
| 20/01/2010 | Wednesday | 249015 | 438 | 562 | 137 | 11 | 68 | 2  | 4 | 59 | 124 | 0.48 | 0.78 | 0.31 | 0.24 |
| 21/01/2010 | Thursday  | 257538 | 331 | 572 | 139 | 12 | 77 | 3  | 4 | 59 | 126 | 0.47 | 0.58 | 0.42 | 0.24 |
| 22/01/2010 | Friday    | 241597 | 314 | 677 | 150 | 10 | 83 | 4  | 2 | 74 | 134 | 0.55 | 0.46 | 0.48 | 0.22 |
| 23/01/2010 | Saturday  | 298916 | 352 | 720 | 170 | 9  | 71 | 7  | 2 | 51 | 109 | 0.47 | 0.49 | 0.48 | 0.24 |
| 24/01/2010 | Sunday    | 255971 | 431 | 765 | 209 | 10 | 97 | 15 | 4 | 53 | 119 | 0.45 | 0.56 | 0.48 | 0.27 |
| 25/01/2010 | Monday    | 239660 | 352 | 593 | 155 | 12 | 91 | 9  | 3 | 73 | 129 | 0.57 | 0.59 | 0.44 | 0.26 |
| 26/01/2010 | Tuesday   | 238776 | 340 | 550 | 142 | 15 | 72 | 7  | 4 | 68 | 132 | 0.52 | 0.62 | 0.42 | 0.26 |
| 27/01/2010 | Wednesday | 304440 | 247 | 443 | 105 | 18 | 58 | 2  | 4 | 54 | 121 | 0.45 | 0.56 | 0.43 | 0.24 |

Figure S1. Diurnal variation in the flow rate of the Brussels-North wastewater treatment plant.

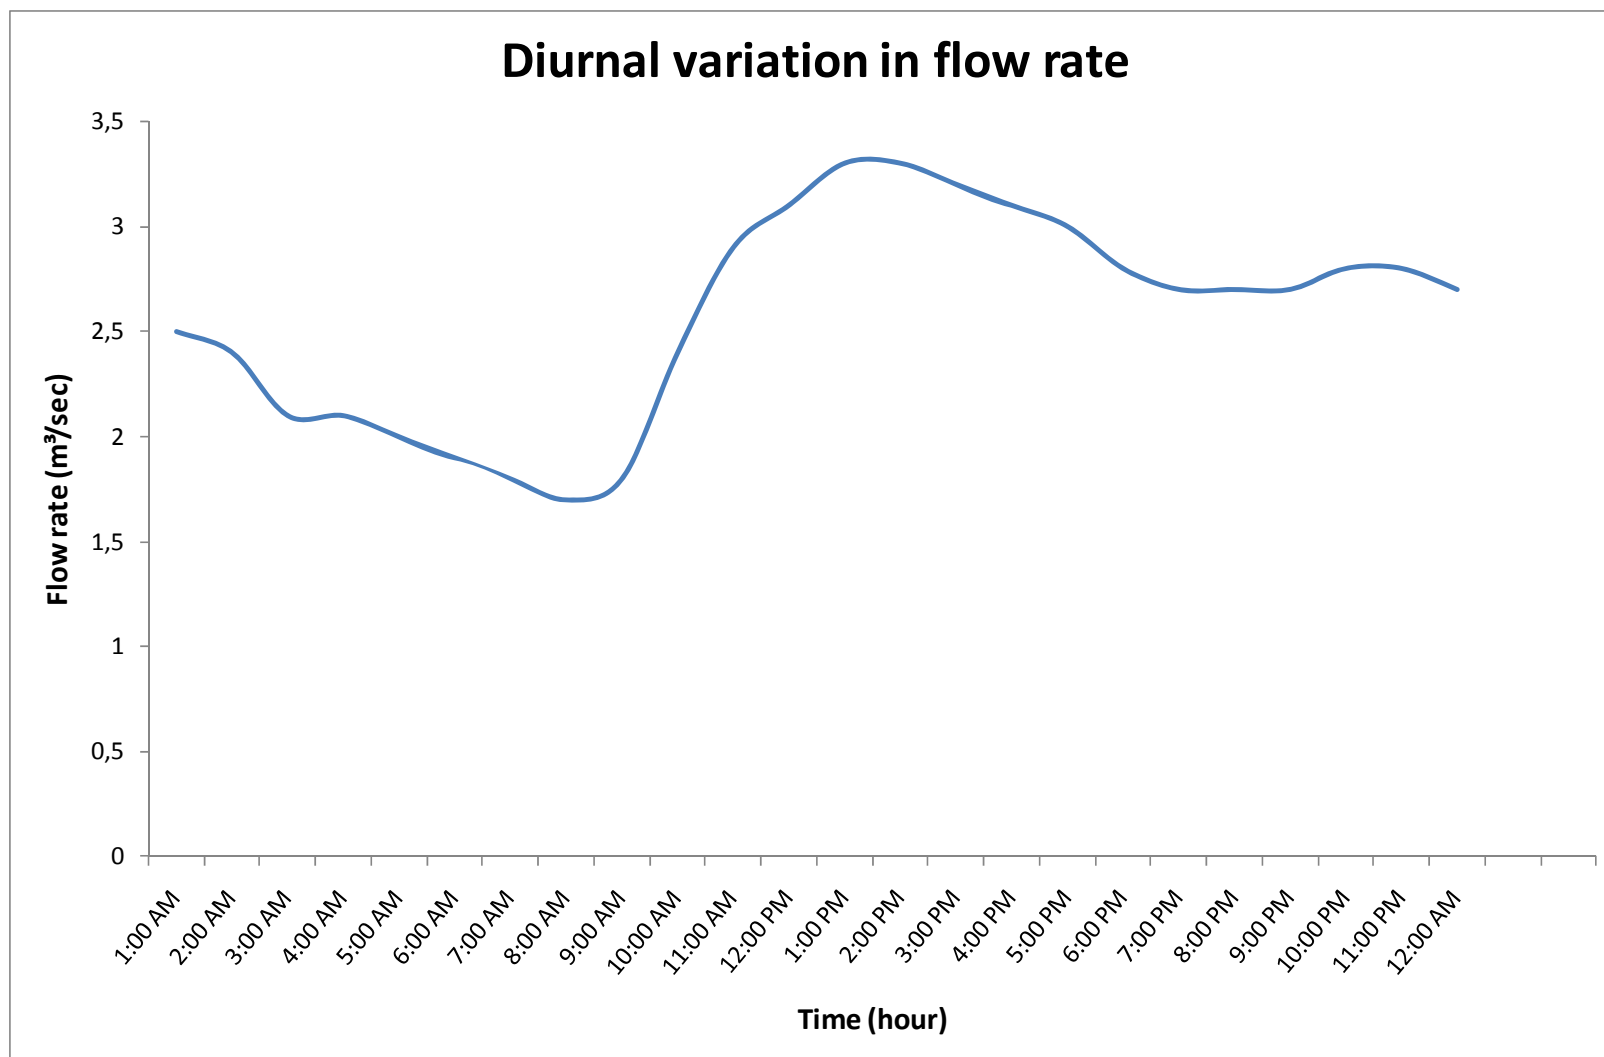

Figure S2. Mean variations between seasons and months in mass loads (in g/day) of illicit drugs and metabolites in influent wastewater from the wastewater treatment plant of Brussels-North. COC: cocaine; BE: benzoylecgonine; EME: ecgonine methyl ester; AMP: amphetamine; MDMA: methylenedioxymethamphetamine; METH: methamphetamine; 6-MAM: 6-monoacetylmorphine; EDDP: ethylidenedimethyldiphenylpyrrolidine; MTD: methadone.

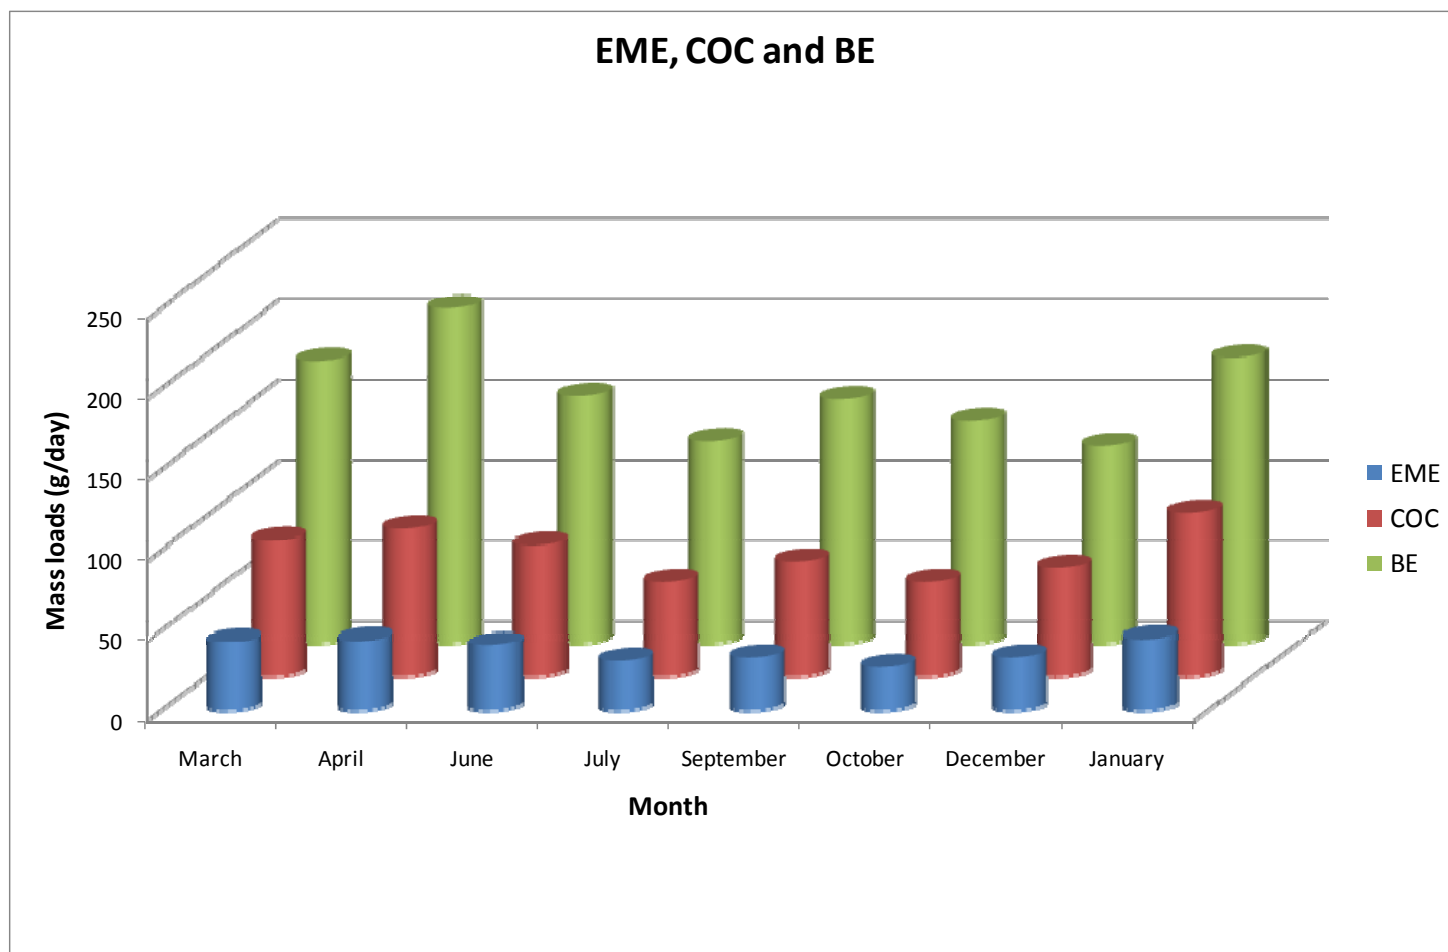

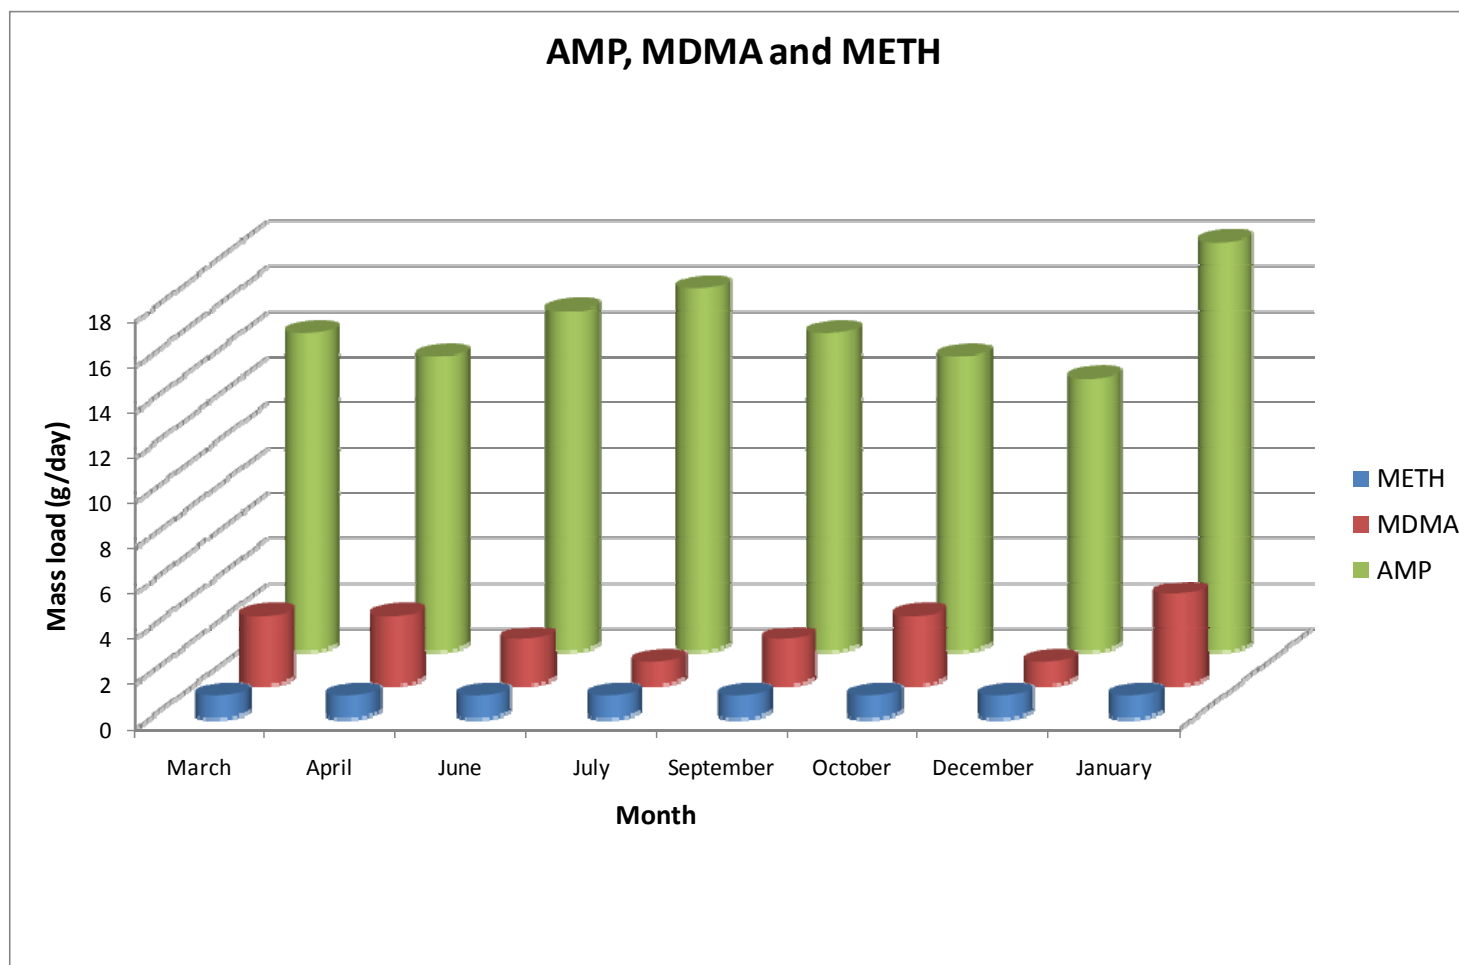

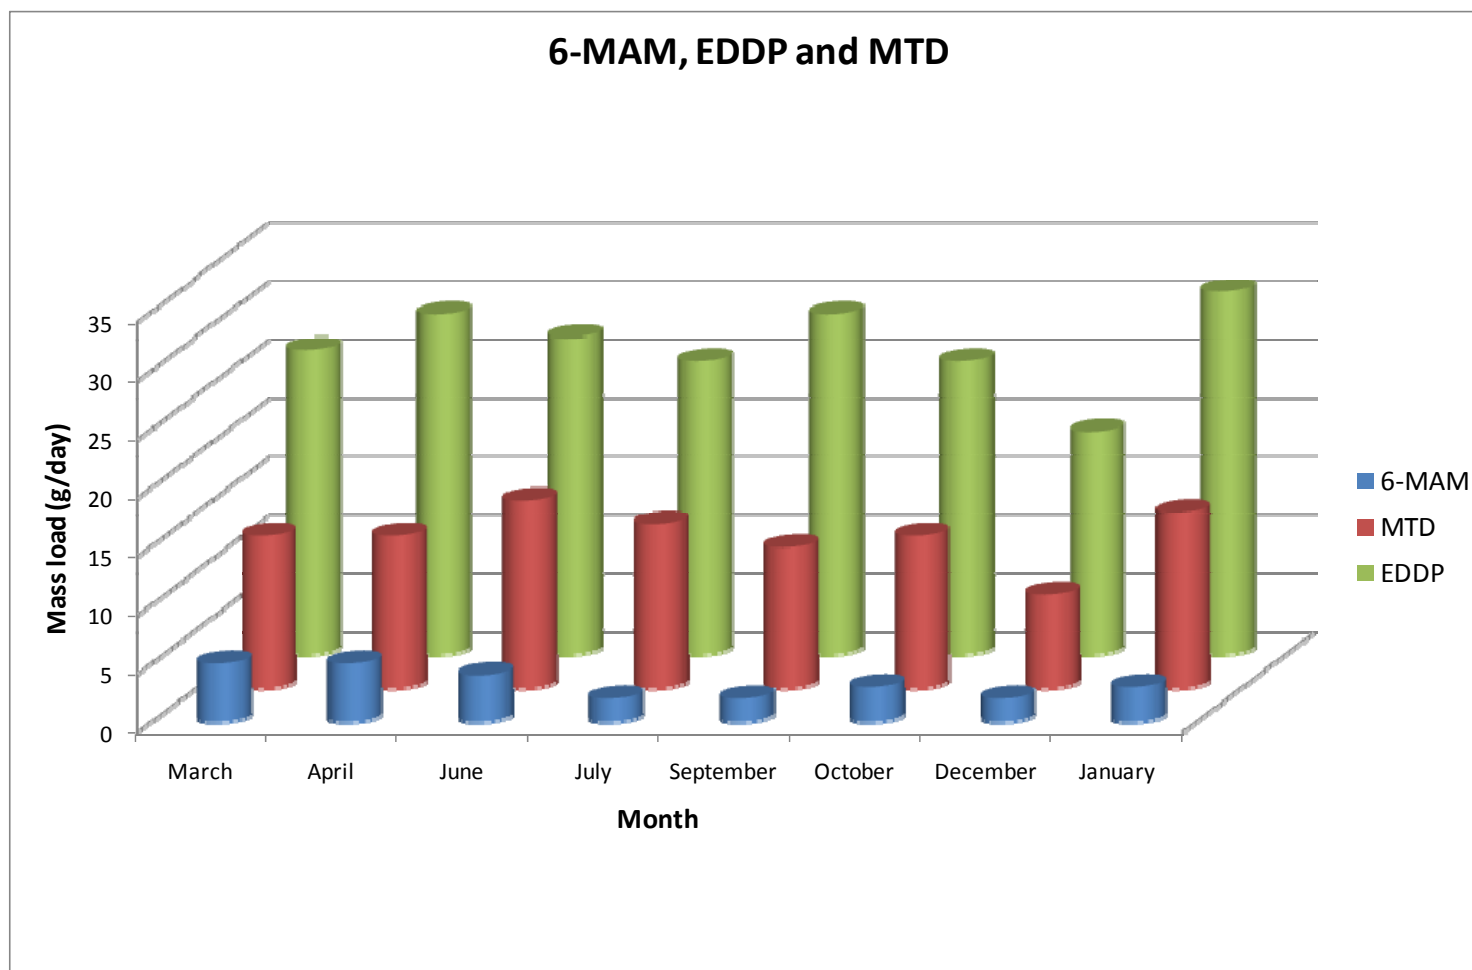

Supplement: c0em00686f.pdf [file c0em00686f.pdf]
